# Supplementary material for: Click-chemistry-derived oxime library reveals efficient reactivators of nerve agent-inhibited butyrylcholinesterase suitable for pseudo-catalytic bioscavenging
Source: Springer Nature journal article supplement (doi:10.1007/s00204-025-03985-6), 2025-03-03
Supplement: MOESM1 [file 204_2025_3985_MOESM1_ESM.pdf]

## Supplementary material

# Click-chemistry-derived oxime library reveals efficient reactivators of nerve agent-inhibited butyrylcholinesterase suitable for pseudocatalytic bioscavenging

Tena Čadež<sup>1</sup>, Nikolina Maček Hrvat<sup>1</sup>, Goran Šinko<sup>1</sup>, Jarosław Kalisiak<sup>2</sup>, Zoran Radić<sup>3</sup>, Valery V. Fokin<sup>2,4</sup>, Karl Barry Sharpless<sup>2</sup>, Palmer Taylor<sup>3</sup>, and Zrinka Kovarik<sup>1,5,\*</sup>

<sup>1</sup> Institute for Medical Research and Occupational Health, Ksaverska cesta 2, Zagreb, Croatia

<sup>2</sup> Skaggs Institute for Chemical Biology, The Scripps Research Institute La Jolla, CA, USA

<sup>3</sup> Skaggs School of Pharmacy and Pharmaceutical Sciences University of California at San Diego La Jolla, CA, USA

<sup>4</sup> Present address: The Bridge@USC and Loker Hydrocarbon Research Institute, University of Southern California, Los Angeles, CA, USA

<sup>5</sup> Faculty of Science, University of Zagreb, Zagreb, Croatia

## Contents

|                                                                                    |   |
|------------------------------------------------------------------------------------|---|
| S1. Reactivation efficacy of cyclosarin inhibited BChE <i>in vitro</i> .....       | 2 |
| S2. Biphasic response of cyclosarin inhibited BChE reactivated with oxime 16C..... | 2 |
| S3. Reactivation efficacy of cyclosarin inhibited AChE <i>in vitro</i> .....       | 3 |
| S4. Molecular modeling .....                                                       | 4 |
| S5. Molecular dynamics .....                                                       | 5 |

## S1. Reactivation efficacy of cyclosarin inhibited BChE *in vitro*

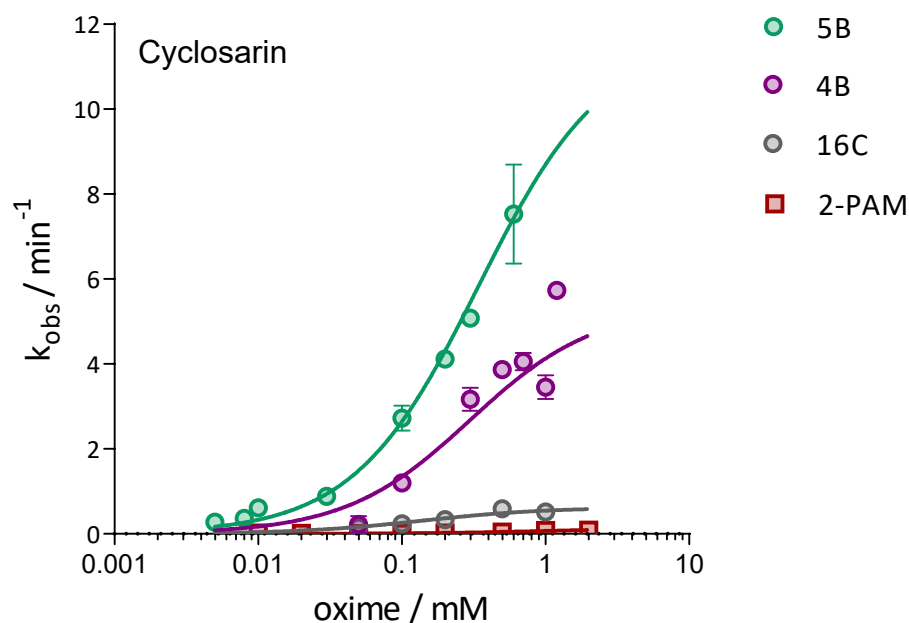

**Figure S1.** Reactivation kinetics of cyclosarin-inhibited BChE by the selected oximes. The results are expressed as mean  $\pm$  SEM calculated from at least three experiments.

## S2. Biphasic response of cyclosarin inhibited BChE reactivated with oxime 16C

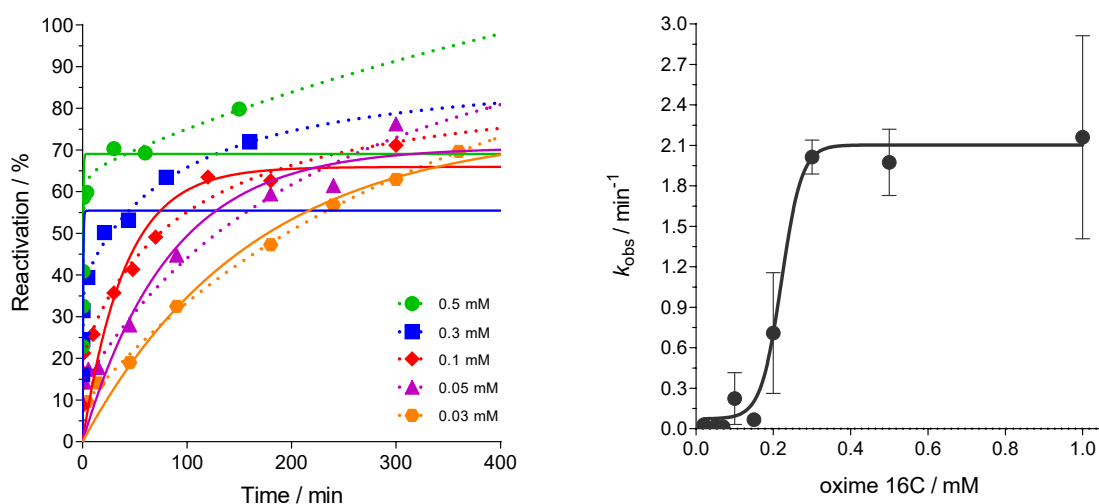

**Figure S2.** Deviation from the typical hyperbolic model in the reactivation of sarin-inhibited BChE with oxime 16C. The left graph shows changes in reactivation percentage over time, with dependence described by a theoretical single-phase curve (solid line) and a modified two-phase curve (dashed line) for each oxime concentration. The right graph illustrates the dependence of observed reactivation rates on oxime concentration. The mean of at least seven experiments  $\pm$  SEM is presented.

### S3. Reactivation efficacy of cyclosarin inhibited AChE *in vitro*

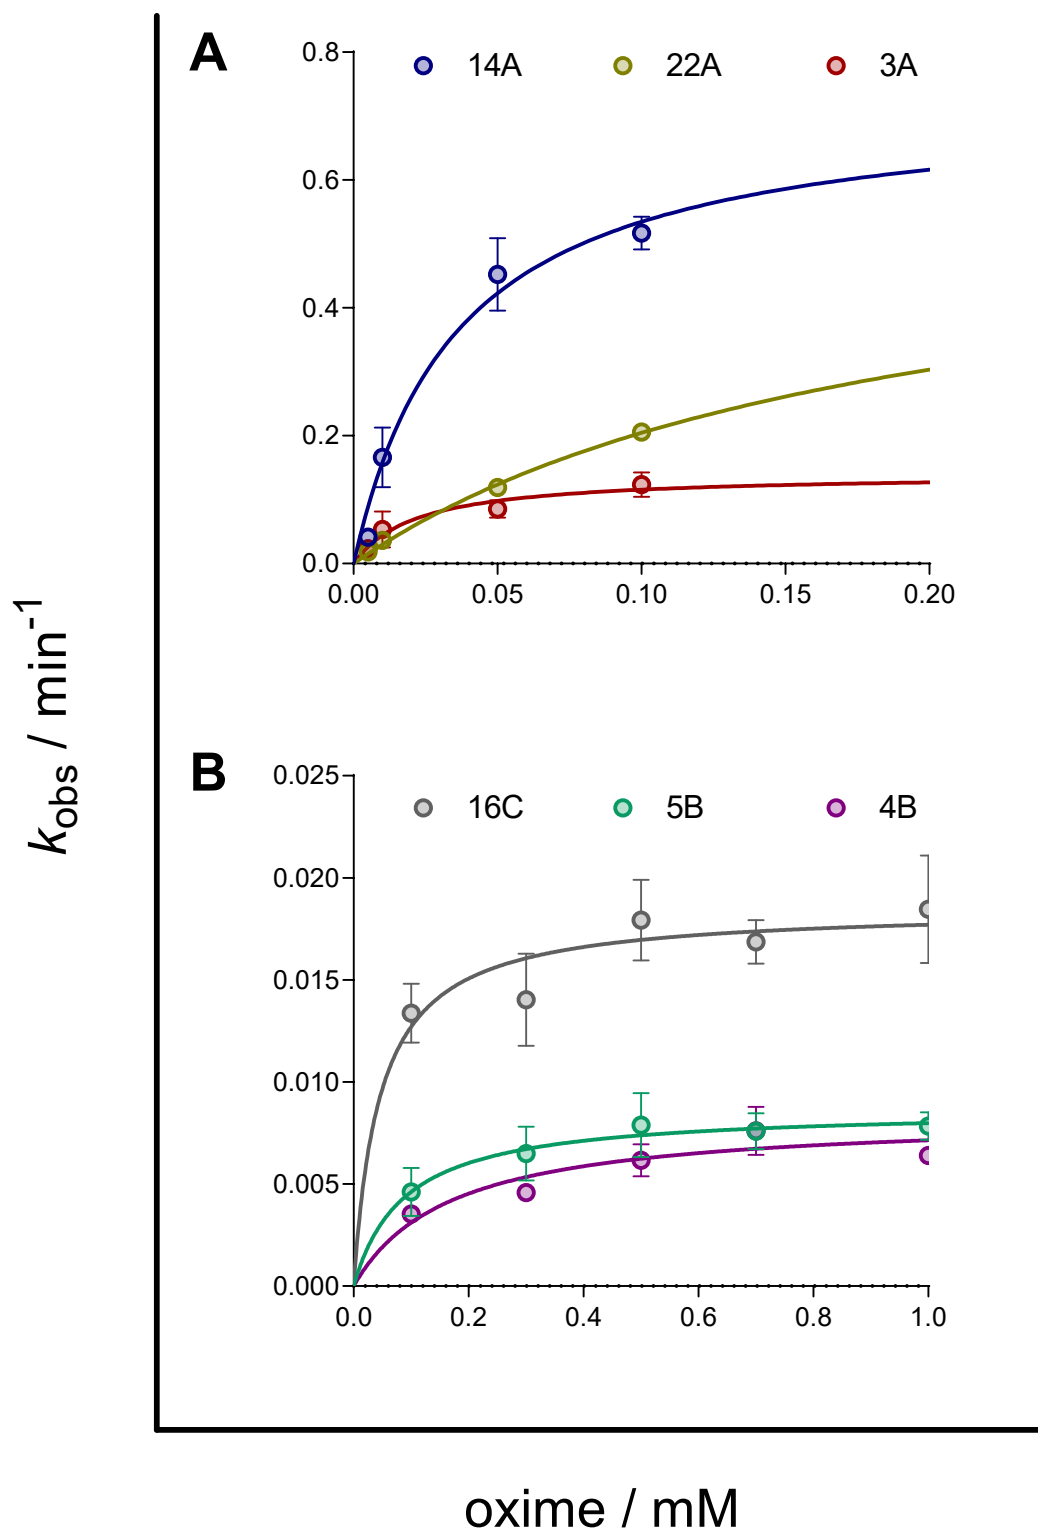

**Figure S3.** Reactivation kinetics ( $k_{\text{obs}}$ ) of cyclosarin-inhibited AChE determined with (A) bis-pyridinium (14A, 22A or 3A) and (B) mono-pyridinium (16C, 5B or 4B) oximes.

## S4. Molecular modeling

### OXIME

4B

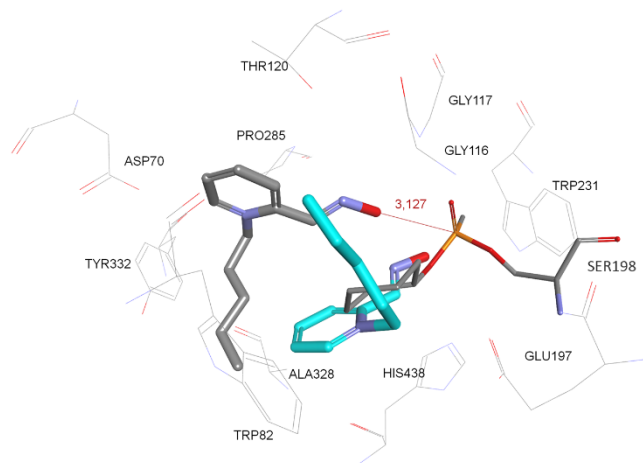

5B

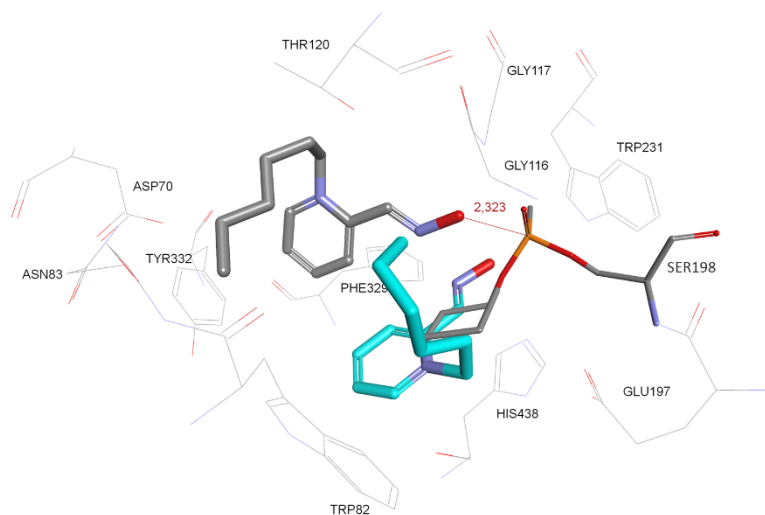

16C

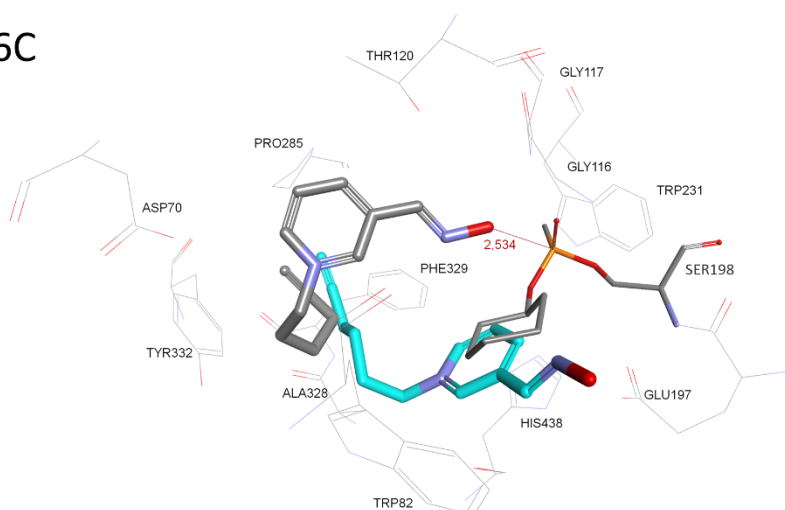

**Figure S4.** Superposition of binding poses of oximes in the active site of native BChE (blue) and in the near-attack conformation in BChE-cyclosarin conjugate (grey; given in **Figure 5**). The red line indicates the distance of the oxime group from the phosphorus atom of cyclosarin conjugate.

## S5. Molecular dynamics

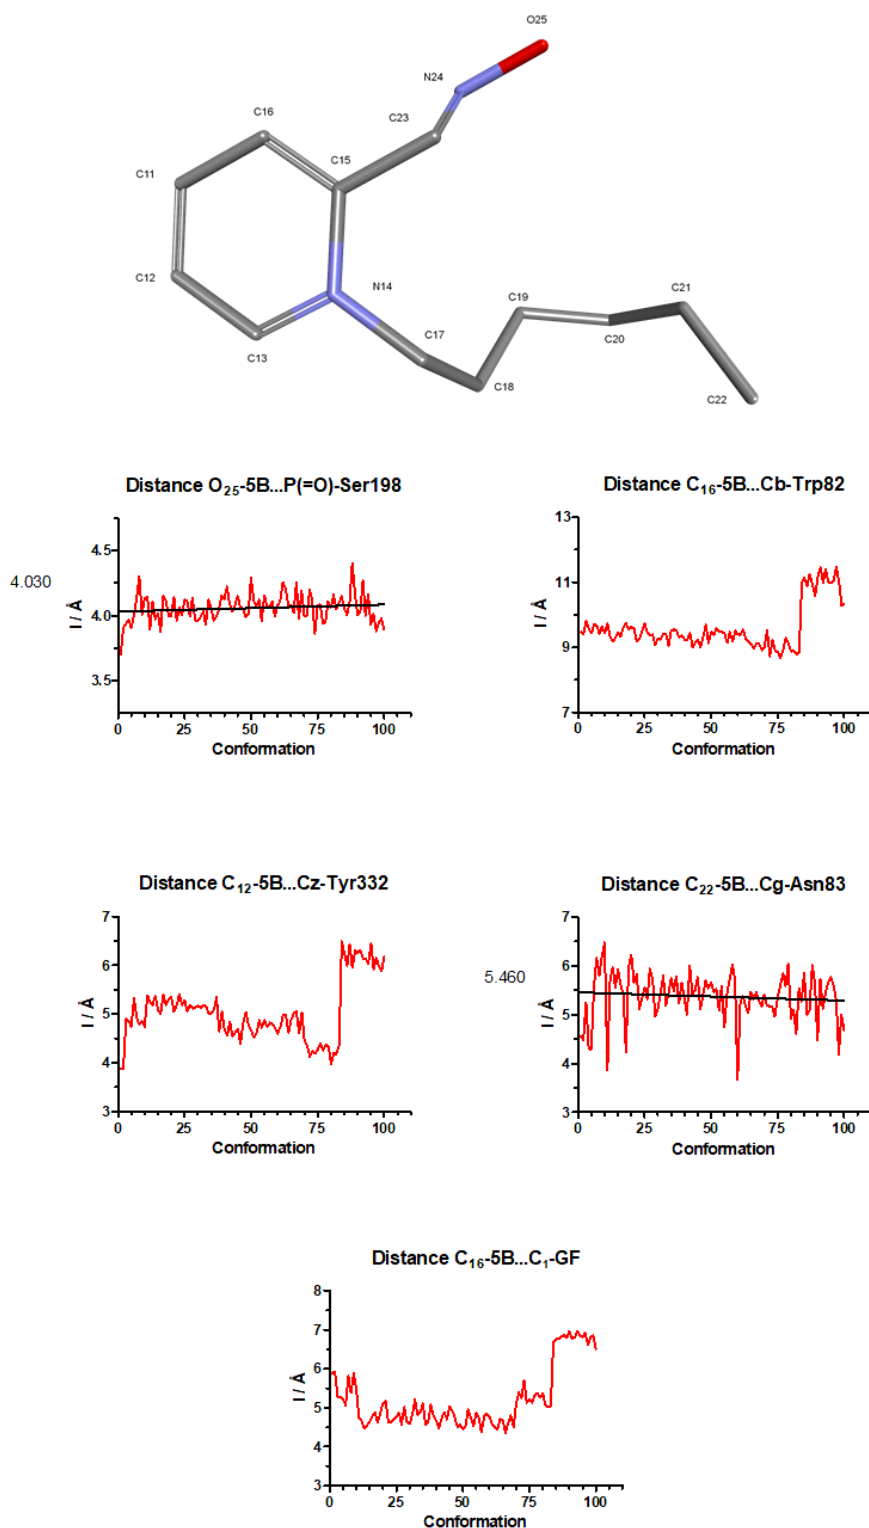

**Figure S5.** Molecular dynamics simulation (t=10 ns) of complex between an oxime 5B and cyclosarin-conjugate of BChE. Distances between atoms of 5B and selected atoms of BChE active site residues are shown. Distance average value (Å) is listed left of Y-axes.
